# Supplementary material for: Anti-aging properties of whey against brain damage of senile Wistar rat
Source: Research Square preprint supplement (doi:10.21203/rs.3.rs-477151/v1), 2021-05-14
Supplement: Supplementary file 1 [file eda61b9989bb31148edcdfd2.pdf]



aging

Impair Cognition

Two  
Rat  
groups

8 moth old  
with or  
without whey  
supplementati  
on

Whey supplementation  
manage brain structure  
and function

30 moth old  
with or  
without whey  
supplementati  
on

Aging reduce neurotransmitters (DA & 5-HT), SOD ,ATP and increase inflammatory markers(TNF-  $\alpha$ , 5-LOX), lipid peroxidation(MDA) and neurodegenerative markers(Tau, amyloid -B and  $\alpha$ -amylase).  
Whey supplementation improve the brain but not restore the normal structure and function.
